# Supplementary material for: Critical Review on Bromate Formation during Ozonation and Control Options for Its Minimization
Source: PubMed Central journal article supplement — Environ Sci Technol. 2023 Jun 26;57(47):18393–409. doi: 10.1021/acs.est.3c00538 (PMC10690720; doi:10.1021/acs.est.3c00538), 2023-06-26
Supplement: es3c00538_si_001.pdf [file es3c00538_si_001.pdf]

1 **Supporting Information**

2 **Critical Review on Bromate Formation during Ozonation and Control Options for**  
3 **its Minimization**

4  
5 Christina M. Morrison<sup>1</sup>, Samantha Hogard<sup>2,3</sup>, Robert Pearce<sup>2,3</sup>, Aarthi Mohan<sup>1</sup>, Aleksey N.  
6 Pisarenko<sup>4</sup>, Eric R.V. Dickenson<sup>1</sup>, Urs von Gunten<sup>5,6\*</sup>, Eric C. Wert<sup>1\*</sup>

7  
8 <sup>1</sup>Southern Nevada Water Authority (SNWA), P.O. Box 99954, Las Vegas, NV 89193-9954, USA

9 <sup>2</sup>Hampton Roads Sanitation District, PO Box 5911, Virginia Beach, VA 23471-0911, USA

10 <sup>3</sup>Civil and Environmental Engineering Department, Virginia Polytechnic Institute and State  
11 University, Blacksburg, VA, USA

12 <sup>4</sup>Trussell Technologies, Inc., 380 Stevens Ave, Suite 212, Solana Beach, CA 92075, USA

13 <sup>5</sup>Eawag, Swiss Federal Institute of Aquatic Science and Technology, Ueberlandstrasse 133,  
14 CH-8600 Dubendorf, Switzerland

15 <sup>6</sup>School of Architecture, Civil and Environmental Engineering (ENAC), Ecole Polytechnique  
16 Fédérale de Lausanne (EPFL), 1015 Lausanne, Switzerland.

17 \*Corresponding authors:

18 UvG: [vongunten@eawag.ch](mailto:vongunten@eawag.ch)

19 ECW: [eric.wert@lvvwd.com](mailto:eric.wert@lvvwd.com)

20 Manuscript for submission to Environmental Science & Technology Special Issue on “Oxidative  
21 Water Treatment: The Track Ahead”

22 Submission Deadline: January 31, 2023

23

24 **S.1: Alternative Designs for O<sub>3</sub> and O<sub>3</sub>/H<sub>2</sub>O<sub>2</sub> Application**

25 The HiPOX system uses multiple ozone injection locations in a tubular reactor while the  
26 PRO<sub>3</sub>MIX approach uses a single ozone gas injection with a series of inefficient static  
27 mixers to sequentially transfer ozone.<sup>1,2</sup> The MEMBRO<sub>3</sub>X concept uses an ozone-  
28 resistant hollow fiber membrane for ozone mass transfer to the water phase containing  
29 H<sub>2</sub>O<sub>2</sub>.<sup>3</sup> Overall, these approaches are geared towards low local ozone residual  
30 concentrations by distributed ozone addition and fast transformation of O<sub>3</sub> to ·OH. This  
31 minimizes the formation of HOBr and can thus mitigate bromate formation.

32

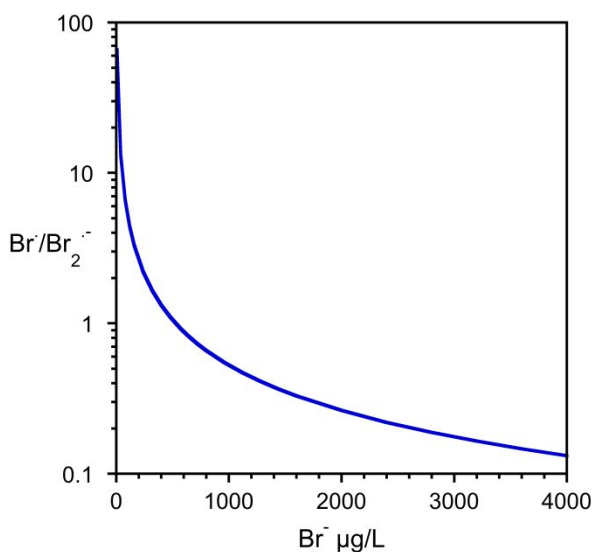

33

34 **Figure S1.** Ratio of the concentrations of Br·/Br<sub>2</sub>·<sup>-</sup> as a function of the bromide  
35 concentration according to the rate constants for equation 12.

36

37 **Table S1** Summary of bromate formation models based on multiple linear regressions and water matrix.

| Water Matrix | Predictive Equation                                                                                                                                                                                                                                                                                                                                | Units                                                                                                                                                                                            | Boundary Conditions                                                                                                                                      | Ref. |
|--------------|----------------------------------------------------------------------------------------------------------------------------------------------------------------------------------------------------------------------------------------------------------------------------------------------------------------------------------------------------|--------------------------------------------------------------------------------------------------------------------------------------------------------------------------------------------------|----------------------------------------------------------------------------------------------------------------------------------------------------------|------|
| SW           | 1. $[\text{BrO}_3^-] = 1.55 \times 10^{-6} [\text{Br}^-]^{-0.73} [\text{DOC}]^{-1.26} [\text{pH}]^{5.82} [\text{O}_3]^{1.57} t^{0.28}$<br>2. $[\text{BrO}_3^-] = 1.63 \times 10^{-6} [\text{Br}^-]^{-0.73} [\text{DOC}]^{-1.3} [\text{pH}]^{5.79} [\text{O}_3]^{1.59} t^{0.27} [\text{NH}_3\text{-N}]^{-0.033}$                                    | $\text{BrO}_3^-$ ( $\mu\text{g/L}$ ), $\text{Br}^-$ ( $\mu\text{g/L}$ ), DOC (mg/L), $\text{O}_3$ (mg/L), $\text{NH}_3\text{-N}$ (mg/L), pH, t (min), Temp (20 °C)                               | 70 < Br < 440<br>1.1 < DOC < 8.4<br>6.5 < pH < 8.5<br>1.1 < $\text{O}_3$ < 10.0<br>1 < t < 120                                                           | 4    |
| SW, GW       | $[\text{BrO}_3^-] = 1.5 \times 10^{-3} [\text{DOC}]^{-0.74} [\text{pH}]^{2.26} [\text{O}_3]^{0.64} [\text{Br}^-]^{0.61} [\text{temp}]^{2.03}$                                                                                                                                                                                                      | $\text{BrO}_3^-$ ( $\mu\text{g/L}$ ), $\text{Br}^-$ ( $\mu\text{g/L}$ ), DOC (mg/L), $\text{O}_3$ (mg/L), pH, Temp (°C)                                                                          | 250 < Br < 1500<br>3.0 < DOC < 7.0<br>6.5 < pH < 8.5<br>1.5 < $\text{O}_3$ < 17.5<br>20 < T < 30                                                         | 5    |
| SW           | $[\text{BrO}_3^-] = 7.76 \times 10^{-7} [\text{Br}^-]^{0.88} [\text{DOC}]^{-1.18} [\text{NH}_3\text{-N}]^{-0.18} [\text{O}_3]^{1.42} \text{pH}^{5.11} [\text{IC}]^{0.18} t^{0.27}$                                                                                                                                                                 | $\text{BrO}_3^-$ ( $\mu\text{g/L}$ ), $\text{Br}^-$ ( $\mu\text{g/L}$ ), DOC (mg/L), $\text{O}_3$ (mg/L), $\text{NH}_3\text{-N}$ (mg/L), pH, IC (mg/Las $\text{CaCO}_3$ ), t (min), Temp (20 °C) | 100 < Br < 1000<br>1.5 < DOC < 6.0<br>1.0 < IC < 216<br>6.5 < pH < 8.5<br>0.005 < $\text{NH}_3\text{-N}$ < 0.7<br>1.5 < $\text{O}_3$ < 6.0<br>1 < t < 30 | 6    |
| SW           | 1. $[\text{BrO}_3^-] = 4.36 \times 10^{-4} [\text{Br}^-]^{-1.136} [\text{DOC}]^{-1.267} [\text{pH}]^{1.774} [\text{O}_3]^{1.575} [\text{time}]^{1.014}$<br>2. $[\text{BrO}_3^-] = 2.75 \times 10^{-4} [\text{Br}^-]^{-1.137} [\text{DOC}]^{-1.186} [\text{pH}]^{0.253} [\text{O}_3]^{1.598} [\text{time}]^{1.014} [\text{NH}_3\text{-N}]^{-0.086}$ | $\text{BrO}_3^-$ ( $\mu\text{g/L}$ ), $\text{Br}^-$ ( $\mu\text{g/L}$ ), DOC (mg/L), $\text{O}_3$ (mg/L), $\text{NH}_3\text{-N}$ (mg/L), pH, IC (mg/Las $\text{CaCO}_3$ ), t (min)               | 75 < Br < 145<br>6.5 < pH < 8.5<br>T = 20 °C<br>1.1 < $\text{O}_3$ < 10.0<br>1.1 < DOC < 8.4<br>1 < t < 120<br>0 < $\text{NH}_3\text{-N}$ < 1.5          | 7    |
| DW           | $[\text{BrO}_3^-] = 5.41 \times 10^{-5} [\text{Br}^-]^{-0.040} [\text{DOC}]^{-1.080} [\text{pH}]^{4.7} [\text{O}_3]^{1.120} [\text{time}]^{0.304} [\text{temp}]^{0.580}$<br>$[\text{BrO}_3^-]_{\text{temp}} = [\text{BrO}_3^-]_{\text{20}^\circ\text{C}} (1.035)^{\text{Temp}-20}$                                                                 | $\text{BrO}_3^-$ ( $\mu\text{g/L}$ ), $\text{Br}^-$ ( $\mu\text{g/L}$ ), DOC (mg/L), $\text{O}_3$ (mg/L), $\text{NH}_3\text{-N}$ (mg/L), pH, IC (mg/Las $\text{CaCO}_3$ ), t (min), Temp (°C)    | 70 < Br < 440<br>1.1 < DOC < 8.4<br>6.5 < pH < 8.5<br>1.1 < $\text{O}_3$ < 10.0<br>1 < t < 120                                                           | 8    |
| DW           | 1. $[\text{BrO}_3^-] = 1.19 \times 10^{-7} [\text{Br}^-]^{-0.96} [\text{UV}_{254}]^{-0.623} [\text{pH}]^{5.68} [\text{O}_3]^{1.307} [\text{time}]^{0.336} [\text{Alk}]^{-0.201}$                                                                                                                                                                   | $\text{BrO}_3^-$ ( $\mu\text{g/L}$ ), $\text{Br}^-$ ( $\mu\text{g/L}$ ), $\text{O}_3$ (mg/L), $\text{UV}_{254}$ ( $\text{cm}^{-1}$ ), pH, Alk                                                    | 70 < Br < 440<br>0.010 < $\text{UV}_{254}$ < 0.280                                                                                                       | 9    |

|        |                                                                                                                                                                                                                                                                                                                                                                                                                                                                                                                                                                                                                                                                                             |                                                                                                                                                                                                     |                                                                                                                                                                                                                                      |    |
|--------|---------------------------------------------------------------------------------------------------------------------------------------------------------------------------------------------------------------------------------------------------------------------------------------------------------------------------------------------------------------------------------------------------------------------------------------------------------------------------------------------------------------------------------------------------------------------------------------------------------------------------------------------------------------------------------------------|-----------------------------------------------------------------------------------------------------------------------------------------------------------------------------------------------------|--------------------------------------------------------------------------------------------------------------------------------------------------------------------------------------------------------------------------------------|----|
|        | 2. $[\text{BrO}_3^-] = 8.71 \times 10^{-8} [\text{Br}^-]^{-0.944} [\text{UV}_{254}]^{-0.593} [\text{pH}]^{5.81} [\text{O}_3]^{1.279} [\text{time}]^{0.337} [\text{Alk}]^{0.167} [\text{NH}_3\text{-N}]^{-0.051}$                                                                                                                                                                                                                                                                                                                                                                                                                                                                            | (mg/Las CaCO <sub>3</sub> ), t (min), Temp (°C)                                                                                                                                                     | 1.1 < DOC < 8.4<br>6.5 < pH < 8.5<br>1.1 < O <sub>3</sub> < 10.0<br>1 < t < 120<br>13 < Alk < 216<br>0.02 < NH <sub>3</sub> -N < 3                                                                                                   |    |
| DW     | $[\text{BrO}_3^-] = 1.5 \times \text{O}_3 \text{ CT} + 0.5 + 1.4 \times \text{O}_3 \text{ CT} + 0.2$                                                                                                                                                                                                                                                                                                                                                                                                                                                                                                                                                                                        | BrO <sub>3</sub> <sup>-</sup> (µg/L), O <sub>3</sub> CT (mg-O <sub>3</sub> -min/L)                                                                                                                  | 0 < O <sub>3</sub> CT < 2.0<br>T = 12, 20 °                                                                                                                                                                                          | 10 |
| DW     | $[\text{BrO}_3^-] = [\text{NH}_3\text{-N}]^{-0.15} [\text{DOC}]^{-0.26} [\text{Alk}]^{0.45} \text{pH}^{-0.44} [\text{Cl}^-]^{-0.14} [\text{O}_3]^{0.63} \text{time}^{0.54}$<br>$[\text{BrO}_3^-] = [\text{NH}_3\text{-N}]^{-0.14} [\text{DOC}]^{-0.22} [\text{Alk}]^{0.42} \text{pH}^{-0.3} [\text{O}_3]^{0.63} \text{time}^{0.54}$<br>$[\text{BrO}_3^-] = [\text{Br}^-]^{-1.74} [\text{Turbidity}]^{-0.31} [\text{EC}]^{2.11}$<br>$[\text{BrO}_3^-] = [\text{Br}^-]^{0.78} [\text{Cl}^-]^{0.75} [\text{EC}]^{-1.19}$<br>$[\text{BrO}_3^-] = [\text{Br}^-]^{0.47} [\text{O}_3]^{0.62} \text{time}^{0.51}$<br>$[\text{BrO}_3^-] = [\text{EC}]^{0.46} [\text{O}_3]^{0.62} \text{time}^{0.50}$ | BrO <sub>3</sub> <sup>-</sup> (µg/L), Br (µg/L), DOC (mg/L), O <sub>3</sub> (mg/L), NH <sub>3</sub> -N (mg/L), Cl (mg/L), pH, Alk (mg/Las CaCO <sub>3</sub> ), t (min), EC (µS/cm), Turbidity (NTU) | 161 < Br < 4084<br>115 < Alk < 246<br>0.50 < DOC < 1.4<br>16 < Cl < 1170<br>334 < EC < 3940<br>0.06 < NTU < 0.60<br>7.10 < pH < 8.07<br>0.0 < NH <sub>3</sub> -N < 0.019<br>0.5 < O <sub>3</sub> < 3.5<br>0 < t < 60<br>T = 20-23 °C | 11 |
| RO     | $[\text{BrO}_3^-] = e^{-19.40} [\text{Br}^-]^{0.8} \text{dose}^{1.26} \text{t}^{0.89} \text{pH}^{7.28}$                                                                                                                                                                                                                                                                                                                                                                                                                                                                                                                                                                                     | BrO <sub>3</sub> <sup>-</sup> (mg/L), Br (mg/L), pH, O <sub>3</sub> (mg/L), t (min)                                                                                                                 | 1. < Br < 4.0<br>6.0 < pH < 9.0<br>25 < O <sub>3</sub> < 58.3<br>15 < t < 35                                                                                                                                                         | 12 |
| RW     | $[\text{BrO}_3^-] = 3.855 \times 10^{-8} [\text{Br}^-]^{1.43} (\text{O}_3 \text{ mg/min})^{0.93} \text{pH}^{3.01} \text{T}^{1.20} \text{t}^{0.83}$                                                                                                                                                                                                                                                                                                                                                                                                                                                                                                                                          | BrO <sub>3</sub> <sup>-</sup> (µg/L), Br (µg/L), DOC (mg/L), O <sub>3</sub> (mg/min), NH <sub>3</sub> -N (mg/L), pH, IC (mg/Las CaCO <sub>3</sub> ), t (min), Temp (°C)                             | 50 < Br < 1000<br>3.0 < pH < 8.0<br>0.5 < O <sub>3</sub> < 2.25<br>0 < t < 180<br>15 < T < 35                                                                                                                                        | 13 |
| RW     | 1. $[\text{BrO}_3^-] = 0.603 \times 10^{-1} [\text{Br}^-]^{0.35} [\text{O}_3]^{1.31}$<br>2. $d[\text{BrO}_3^-]/dt = k' \times [\text{O}_3]^{1.4}$                                                                                                                                                                                                                                                                                                                                                                                                                                                                                                                                           | 1. BrO <sub>3</sub> <sup>-</sup> (µg/L), Br (µg/L), O <sub>3</sub> (mg/L), pH = 7.5<br>2. [BrO <sub>3</sub> <sup>-</sup> ] (M), [O <sub>3</sub> ] (M), k' (M <sup>-(ab-1)</sup> s <sup>-1</sup> )   | 50 < Br < 300<br>0.7 < O <sub>3</sub> < 3.8<br>a = 0.5, b = 1.4<br>k' = 0.069 at pH 6.5<br>k' = 0.45 at pH 7.5<br>k' = 2.1 at pH 8.5                                                                                                 | 14 |
| SW, WW | $[\text{BrO}_3^-] = 7.64 \times 10^{-9} e^{(0.237 \cdot \text{HS}(\%))}$                                                                                                                                                                                                                                                                                                                                                                                                                                                                                                                                                                                                                    | BrO <sub>3</sub> <sup>-</sup> (µg/L), Br (µg/L), DOC (mg/L),                                                                                                                                        | 0 < HS % < 100<br>100 < Br < 500                                                                                                                                                                                                     | 15 |

|    |                                                                                  |                                                                                                                                |                                                                                                                             |    |
|----|----------------------------------------------------------------------------------|--------------------------------------------------------------------------------------------------------------------------------|-----------------------------------------------------------------------------------------------------------------------------|----|
|    |                                                                                  | UV <sub>254</sub> (cm <sup>-1</sup> ), EC (μS/cm), HS (%) = % reduction in emission at 415 - 490 nm                            | 5.82 < DOC < 14.87<br>0.130 < UV <sub>254</sub> < 0.727<br>6.92 < pH < 7.48<br>314 < EC < 652                               |    |
| WW | [Br: BrO <sub>3</sub> <sup>-</sup> ] = 0.08[O <sub>3</sub> :TOC] <sup>2.26</sup> | Br: BrO <sub>3</sub> <sup>-</sup> (mg Br: mg BrO <sub>3</sub> <sup>-</sup> ), O <sub>3</sub> :TOC (mg O <sub>3</sub> : mg TOC) | 0.2 < O <sub>3</sub> :TOC < 1.95<br>42 < Br < 820                                                                           | 16 |
| WW | [Br: BrO <sub>3</sub> <sup>-</sup> ] = 0.07[O <sub>3</sub> :TOC] <sup>2.13</sup> | Br: BrO <sub>3</sub> <sup>-</sup> (mg Br: mg BrO <sub>3</sub> <sup>-</sup> ), O <sub>3</sub> :TOC (mg O <sub>3</sub> : mg TOC) | 0.2 < O <sub>3</sub> :TOC < 1.55<br>100 < Br < 870<br>86 < Alk < 206<br>6.26 < DOC < 11.0<br>7.0 < pH < 8.0<br>T = 20-28 °C | 17 |

38 SW = surface water; GW = ground water; RO = reverse osmosis permeate; RW = reagent water; WW = waste water.

39 **Table S2** Studies on ammonium addition as a bromate control strategy during  
 40 ozonation. SW = Surface Water, \*DOC (mg/L)

| Scale | Water Type | pH  | TOC (mg/L) | Alkalinity (mg/L as CaCO <sub>3</sub> ) | Ozone exposure (Ct) (mg.min/L) | NH <sub>3</sub> Dose (ug NH <sub>3</sub> -N/L) | Bromate Minimization (%) | Reference |
|-------|------------|-----|------------|-----------------------------------------|--------------------------------|------------------------------------------------|--------------------------|-----------|
| Bench | GW         | 8.2 | 4.0        | 132                                     | ~0.37                          | 300                                            | 67                       | 18        |
| Bench | GW         | 8.2 | 4.0        | 132                                     | ~0.93                          | 600                                            | 83                       | 18        |
| Bench | SW         | 8   | 1.3*       | 2.4 mM                                  | 8-9                            | 164                                            | 50                       | 19        |
| Pilot | SW         | 8   | 2.59       | 137                                     | 4.1                            | 100                                            | 42-62                    | 20        |
| Pilot | SW         | 8   | 2.59       | 137                                     | 4.09                           | 300                                            | 65-70                    | 20        |
| Pilot | SW         | 8   | 2.59       | 137                                     | 3.93                           | 500                                            | 70-73                    | 20        |
| Pilot | SW         | 8.3 | 3.7        | 73                                      | ~6.8                           | 200                                            | 40-67                    | 21        |
| Pilot | SW         | 8.3 | 3.7        | 73                                      | ~6.8                           | 900                                            | 60                       | 21        |

41

42

43 **Table S3** Performance of Cl<sub>2</sub>-NH<sub>3</sub> as a bromate control strategy during ozone  
 44 treatment. \*DOC (mg/L)

| Scale | Water Type | pH  | TOC (mg/L) | Alkalinity (mg/L as CaCO <sub>3</sub> ) | Ozone Exposure (mg.min/L) | Cl <sub>2</sub> dose (mg/L) | NH <sub>3</sub> dose (ug NH <sub>3</sub> -N/L) | Bromate Minimization (%) | Reference |
|-------|------------|-----|------------|-----------------------------------------|---------------------------|-----------------------------|------------------------------------------------|--------------------------|-----------|
| Bench | SW         | 7.5 | 1.7*       | 2.6 mM                                  | 6                         | 0.7                         | 82                                             | 61                       | 22        |
| Bench | SW         | 7.5 | 1.7*       | 2.6 mM                                  | 6                         | 0.7                         | 164                                            | 81                       | 22        |
| Bench | SW         | 7.5 | 1.7*       | 2.6 mM                                  | 6                         | 0.7                         | 247                                            | 83                       | 22        |
| Bench | SW         | 7.5 | 1.7*       | 2.6 mM                                  | 6                         | 0.7                         | 329                                            | 83                       | 22        |
| Bench | GW         | 8.2 | 4          | 132                                     | 0.35                      | 2                           | 0.6                                            | 92                       | 18        |
| Pilot | SW         | 8   | 2.59       | 137                                     | 4.50                      | 0.25                        | 100                                            | 44-69                    | 20        |
| Pilot | SW         | 8   | 2.59       | 137                                     | 4.19                      | 0.5                         | 100                                            | 66-72                    | 20        |
| Pilot | SW         | 8   | 2.59       | 137                                     | 3.98                      | 0.25                        | 300                                            | 78-82                    | 20        |
| Pilot | SW         | 8   | 2.59       | 137                                     | 3.90                      | 0.5                         | 300                                            | 75-81                    | 20        |
| Pilot | SW         | 8   | 2.59       | 137                                     | 4.41                      | 0.5                         | 500                                            | 93-94                    | 20        |

45

46

47 **Table S4** Performance of preformed monochloramine for bromate control during ozone  
 48 treatment

| Scale | Water Type | pH  | TOC (mg/L) | Alkalinity (mg/L as CaCO <sub>3</sub> ) | Specific Ozone Dose*             | Dose (mg NH <sub>2</sub> Cl as Cl <sub>2</sub> /L) | Bromate Minimization (%) | Reference |
|-------|------------|-----|------------|-----------------------------------------|----------------------------------|----------------------------------------------------|--------------------------|-----------|
| Pilot | WW         | 7.1 | 6.6        | 178                                     | Up to 1.2 mg O <sub>3</sub> :TOC | 1                                                  | 68                       | 23        |
| Pilot | WW         | 7.1 | 6.6        | 178                                     | Up to 1.2 mg O <sub>3</sub> :TOC | 3                                                  | 84                       | 23        |
| Pilot | WW         | 7.1 | 6.6        | 178                                     | Up to 1.2 mg O <sub>3</sub> :TOC | 5                                                  | 87                       | 23        |

49

50



51 **Table S5** Performance of hydrogen peroxide for bromate control during ozone  
 52 treatment, ND=not determined, \*DOC (mg/L)

| Scale | Water Type | pH  | TOC (mg/L) | Alkalinity (mg/L as CaCO <sub>3</sub> ) | Specific Ozone Dose (mg O <sub>3</sub> : mg DOC) | H <sub>2</sub> O <sub>2</sub> Dose (mol H <sub>2</sub> O <sub>2</sub> :mol O <sub>3</sub> ) | Bromate Minimization (%) | Reference |
|-------|------------|-----|------------|-----------------------------------------|--------------------------------------------------|---------------------------------------------------------------------------------------------|--------------------------|-----------|
| Bench | SW         | 8.1 | 1.6        | 96.4                                    | 1.61                                             | 0.14                                                                                        | 21                       | 24        |
| Bench | SW         | 8.1 | 1.6        | 96.4                                    | 1.61                                             | 0.28                                                                                        | 26                       | 24        |
| Bench | SW         | 8.1 | 1.6        | 96.4                                    | 1.61                                             | 0.71                                                                                        | 45                       | 24        |
| Bench | SW         | 8.1 | 1.6        | 96.4                                    | 1.61                                             | 1.4                                                                                         | 60                       | 24        |
| Bench | SW         | 7.9 | 2.4        | 163.3                                   | 1.05                                             | 0.14                                                                                        | -29                      | 24        |
| Bench | SW         | 7.9 | 2.4        | 163.3                                   | 1.05                                             | 0.28                                                                                        | -21                      | 24        |
| Bench | SW         | 7.9 | 2.4        | 163.3                                   | 1.05                                             | 0.71                                                                                        | -7                       | 24        |
| Bench | SW         | 7.9 | 2.4        | 163.3                                   | 1.05                                             | 1.4                                                                                         | 14                       | 24        |
| Bench | SW         | 8.0 | 6.4        | 106.9                                   | 0.39                                             | 0.14                                                                                        | -60                      | 24        |
| Bench | SW         | 8.0 | 6.4        | 106.9                                   | 0.39                                             | 0.28                                                                                        | -114                     | 24        |
| Bench | SW         | 8.0 | 6.4        | 106.9                                   | 0.39                                             | 0.71                                                                                        | -120                     | 24        |
| Bench | SW         | 8.0 | 6.4        | 106.9                                   | 0.39                                             | 1.4                                                                                         | -129                     | 24        |
| Bench | WW         | 7.3 | 8.6        | ND                                      | 1.2                                              | 0.5                                                                                         | 15                       | 25        |
| Bench | WW         | 7.3 | 8.6        | ND                                      | 1.2                                              | 1                                                                                           | 35                       | 25        |
| Bench | WW         | 7.0 | 4.7        | 145                                     | 1                                                | 0.5                                                                                         | 32                       | 26        |
| Bench | WW         | 7.0 | 4.7        | 145                                     | 1                                                | 1                                                                                           | 46                       | 26        |
| Bench | WW         | 7.2 | 4.7        | 220                                     | 1                                                | 0.5                                                                                         | 19                       | 26        |
| Bench | WW         | 7.2 | 4.7        | 220                                     | 1                                                | 1                                                                                           | 32                       | 26        |
| Bench | WW         | 7.1 | 7.0        | 105                                     | 1                                                | 0.5                                                                                         | 27                       | 26        |
| Bench | WW         | 7.1 | 7.0        | 105                                     | 1                                                | 1                                                                                           | 25                       | 26        |
| Bench | WW         | 6.9 | 7.1        | 123                                     | 1                                                | 0.5                                                                                         | 14                       | 26        |
| Bench | WW         | 6.9 | 7.1        | 123                                     | 1                                                | 1                                                                                           | 17                       | 26        |
| Bench | WW         | 7.6 | 5.7        | 134                                     | 1                                                | 0.5                                                                                         | -50                      | 26        |

|       |    |     |      |     |     |         |       |    |
|-------|----|-----|------|-----|-----|---------|-------|----|
| Bench | WW | 7.6 | 5.7  | 134 | 1   | 1       | 0     | 26 |
| Bench | WW | 7.3 | 15.0 | 332 | 1   | 0.5     | 37    | 26 |
| Bench | WW | 7.3 | 15.0 | 332 | 1   | 1       | 48    | 26 |
| Bench | WW | 7.3 | 7.0  | 205 | 1   | 0.5     | 14    | 26 |
| Bench | WW | 7.3 | 7.0  | 205 | 1   | 1       | 14    | 26 |
| Bench | WW | 7.3 | 6.3  | 169 | 1   | 0.5     | 13    | 26 |
| Bench | WW | 7.3 | 6.3  | 169 | 1   | 1       | 8     | 26 |
| Bench | WW | 7.0 | 4.7  | 145 | 1.5 | 0.5     | 32    | 26 |
| Bench | WW | 7.0 | 4.7  | 145 | 1.5 | 1       | 45    | 26 |
| Bench | WW | 7.2 | 4.7  | 220 | 1.5 | 0.5     | 10    | 26 |
| Bench | WW | 7.2 | 4.7  | 220 | 1.5 | 1       | 36    | 26 |
| Bench | WW | 7.1 | 7.0  | 105 | 1.5 | 0.5     | 13    | 26 |
| Bench | WW | 7.1 | 7.0  | 105 | 1.5 | 1       | 34    | 26 |
| Bench | WW | 6.9 | 7.1  | 123 | 1.5 | 0.5     | 23    | 26 |
| Bench | WW | 6.9 | 7.1  | 123 | 1.5 | 1       | 41    | 26 |
| Bench | WW | 7.6 | 5.7  | 134 | 1.5 | 0.5     | 11    | 26 |
| Bench | WW | 7.6 | 5.7  | 134 | 1.5 | 1       | 22    | 26 |
| Bench | WW | 7.3 | 15.0 | 332 | 1.5 | 0.5     | 0     | 26 |
| Bench | WW | 7.3 | 15.0 | 332 | 1.5 | 1       | -5    | 26 |
| Bench | WW | 7.3 | 7.0  | 205 | 1.5 | 0.5     | 55    | 26 |
| Bench | WW | 7.3 | 7.0  | 205 | 1.5 | 1       | 57    | 26 |
| Bench | WW | 7.3 | 6.3  | 169 | 1.5 | 0.5     | -7    | 26 |
| Bench | WW | 7.3 | 6.3  | 169 | 1.5 | 1       | 14    | 26 |
| Bench | WW | 7.8 | 7.8* | ND  | 1.5 | 0.6-1.5 | 36-67 | 16 |

54 **References**

- 55 1. Bowman, R. H. Hypox Advanced Oxidation of Tba and Mtbe in Groundwater. in  
56 Contaminated Soils, Sediments, and Water: Science in the Real World (eds. Calabrese,  
57 E. J., KostECKI, P. T. & Dragun, J.) 299–213 (Springer US, 2005).  
58 doi:https://doi.org/10.1007/0-387-23079-3\_19.
- 59 2. Bourgin, M., Borowska, W., Helbing, J., Hollender, J., Kaiser, H.-P., Kienle, C., McArell,  
60 C. S., Simon, E., & von Gunten, U. Effect of operational and water quality parameters on  
61 conventional ozonation and the advanced oxidation process O<sub>3</sub>/H<sub>2</sub>O<sub>2</sub>: Kinetics of  
62 micropollutant abatement, transformation product and bromate formation in a surface  
63 water. *Water Res.* (2017) 122, 234–245.
- 64 3. Merle, T., Pronk, W. & von Gunten, U. MEMBRO3X, a novel combination of a  
65 membrane contactor with advanced oxidation (O<sub>3</sub>/H<sub>2</sub>O<sub>2</sub>) for simultaneous  
66 micropollutant abatement and bromate minimization. *Environ. Sci. Technol. Lett.* (2017)  
67 4, 180–185.
- 68 4. Ozekin, K. Modeling Bromate Formation During Ozonation and Assessing its Control,  
69 PhD. (University of Colorado, Boulder, 1994).
- 70 5. Siddiqui, M., Amy, G., Ozekin, K. & Westerhoff, P. Empirically and Theoretically-Based  
71 Models for Predicting Brominated Ozonated by-Products. *Ozone Sci. Eng.* (1994)16,  
72 157–178.
- 73 6. Song, R. et al. Empirical Modeling of Bromate Formation During Ozonation of Bromide-  
74 Containing Waters. *Water Res.* (1996) 30, 1161–1168.
- 75 7. Ozekin, K. & Amy, G. L. Threshold Levels for Bromate Formation In Drinking Water.  
76 *Ozone Sci. Eng.* (1997) 19, 323–337.
- 77 8. Galey, C., Sohn, J., Amy, G. & Cavard, J. Modeling Bromate Formation at the Full Scale:  
78 A Comparison of Three Ozonation Plants. in *Am. Water Work. Assoc. Water Quality and*  
79 *Technology Conference* (1997).
- 80 9. Sohn, J., Amy, G., Cho, J., Lee, Y. & Yoon, Y. Disinfectant decay and disinfection by-  
81 products formation model development: Chlorination and ozonation by-products. *Water*  
82 *Res.* (2004) 38, 2461–2478.
- 83 10. Van Der Helm, A. W. C., Smeets, P. W. M. H., Baars, E. T., Rietveld, L. C. & Van Dijk, J.  
84 C. Modeling of ozonation for dissolved ozone dosing. *Ozone Sci. Eng.* (2007) 29, 379–  
85 389.
- 86 11. Civelekoglu, G., Yigit, N. O., Diamadopoulou, E. & Kitis, M. Prediction of bromate  
87 formation using multi-linear regression and artificial neural networks. *Ozone Sci. Eng.*  
88 (2007) 29, 353–362.
- 89 12. Aljundi, I. H. Bromate formation during ozonation of drinking water: A response surface  
90 methodology study. *Desalination* (2011) 277, 24–28.
- 91 13. Moslemi, M., Davies, S. H. & Masten, S. J. Empirical modeling of bromate formation  
92 during drinking water treatment using hybrid ozonation membrane filtration. *Desalination*  
93 (2012) 292, 113–118.
- 94 14. Mizuno, T., Tsuno, H. & Yamada, H. A simple model to predict formation of bromate ion  
95 and hypobromous acid/hypobromite ion through hydroxyl radical pathway during  
96 ozonation. *Ozone Sci. Eng.* (2007) 29, 3–11.
- 97 15. Li, W. T., Cao, M.-J., Young, T., Ruffino, B., Dodd, M., Li, A.-M., & Korshin, G.  
98 Application of UV absorbance and fluorescence indicators to assess the formation of

- 99 biodegradable dissolved organic carbon and bromate during ozonation. *Water Res.*  
100 (2017) 111, 154–162.
- 101 16. Soltermann, F., Abegglen, C., Tschui, M., Stahel, S. & von Gunten, U. Options and  
102 limitations for bromate control during ozonation of wastewater. *Water Res.* (2017) 116,  
103 76–85.
- 104 17. Babcock, N., Breche, N. La, Robinson, K. & Pisarenko, A. N. Empirical Modeling of  
105 Bromate Formation and Chemical Control Strategies at Multiple Water Reuse Facilities  
106 Using Ozone. *Ozone Sci. Eng.* (2023) doi.org/10.1080/01919512.2022.2161469
- 107 18. Ikehata, K., Wang, L., Nessler, M. B., Komor, A. T., Cooper, W. J., & McVicker, R. R.  
108 Effect of Ammonia and Chloramine Pretreatment during the Ozonation of a Colored  
109 Groundwater with Elevated Bromide. *Ozone Sci. Eng.* (2013) 35, 438–447.
- 110 19. Pinkernell, U. & von Gunten, U. Bromate minimization during ozonation: Mechanistic  
111 considerations. *Environ. Sci. Technol.* (2001) 35, 2525–2531.
- 112 20. Wert, E. C., Neemann, J. J., Johnson, D., Rexing, D. & Zegers, R. Pilot-scale and full-  
113 scale evaluation of the chlorine-ammonia process for bromate control during ozonation.  
114 *Ozone Sci. Eng.* (2007) 29, 363–372.
- 115 21. Williams, M. D., Coffey, B. M. & Krasner, S. W. Evaluation of pH and ammonia for  
116 controlling bromate during *Cryptosporidium* disinfection. *J. Am. Water Work. Assoc.*  
117 (2003) 95, 82–93.
- 118 22. Buffle, M.-O., Galli, S. & von Gunten, U. Enhanced Bromate Control during Ozonation:  
119 The Chlorine-Ammonia Process. *Environ. Sci. Technol.* (2004) 38, 5187–5195.
- 120 23. Pearce, R., Hogard, S., Buehlmann, P., Salazar-Benites, G., Wilson, C., Bott, C.  
121 Evaluation of preformed monochloramine for bromate control in ozonation for potable  
122 reuse. *Water Res.* (2022) 211.
- 123 24. Yu, J., Wang, Y., Wang, Q., Wang, Z., Zhang, D., Yang, M. Implications of bromate  
124 depression from H<sub>2</sub>O<sub>2</sub> addition during ozonation of different bromide-bearing source  
125 waters. *Chemosphere* (2020) 252, 126596.
- 126 25. Hübner, U., Zucker, I. & Jekel, M. Options and limitations of hydrogen peroxide addition  
127 to enhance radical formation during ozonation of secondary effluents. *J. Water Reuse  
128 Desalin.* (2015) 5, 8–16.
- 129 26. Lee, Y., Gerrity, D., Lee, M., Gamage, S., Pisarenko, A., Trenholm, R. A., Canonica, S.,  
130 Snyder, S. A., & von Gunten, U. Organic Contaminant Abatement in Reclaimed Water  
131 by UV/H<sub>2</sub>O<sub>2</sub> and a Combined Process consisting of O<sub>3</sub>/H<sub>2</sub>O<sub>2</sub> followed by UV/H<sub>2</sub>O<sub>2</sub>:  
132 Prediction of abatement efficiency, energy consumption, and byproduct formation.  
133 *Environ. Sci. Technol.* (2016) 50, 7, 3809–3819 acs.est.5b04904.

134
